# Supplementary material for: Fall Risk, Functional Status, and Elder Abuse in Older Adults Presenting to the Emergency Department: A Cross-Sectional Study
Source: Research Square preprint supplement (doi:10.21203/rs.3.rs-8768612/v1), 2026-02-10
Supplement: Supplementary file 1 [file 6f7decf46f0a211637ae425f.docx]

**Table 1. Sociodemographic Characteristics of Oncology Patients**

|  | **Average±SD (Min-Max)** | |
| --- | --- | --- |
| **Age** | 58,85±12,16 (35-85) | |
|  | **n** | **%** |
| **Gender**  Female  Male | 29  25 | 53,7  46,3 |
| **Marital Status**  Married  Single | 46  8 | 85,2  14,8 |
| **Educational status**  Illiterate  Literate  Elementary school graduate  High school graduate  Bachelor's degree or higher | 7  5  29  8  5 | 13,0  9,3  53,7  14,8  9,3 |
| **Work Status**  Working  Not Working | 3  51 | 5,6  94,4 |
| **Place of residence before the earthquake**  Province  District  Village | 37  12  5 | 68,5  22,2  9,3 |
| **Place of residence after the earthquake**  Province  District  Village | 34  14  6 | 63,0  25,9  11,1 |
| **People living together**  Alone  Spouse  Spouse and Children  Children  Other (Relative, Neighbors, Friends) | 5  14  23  11  1 | 9,3  25,9  42,6  20,4  1,9 |
| **Presence of children disease**  Yes  No | 28  26 | 51,9  48,1 |
| **Years of diagnosis**  6 Months -1 Year  2-3 Years  4-5 Years  6 years and Above | 20  19  5  10 | 37,0  35,2  9,3  18,5 |
| **Type of disease**  Lung Cancer  Breast Cancer  Prostate Cancer  GIS Cancer  Others Cancers (pancreatic, lymphoma, thyroid) | 9  14  5  10  16 | 16,7  25,9  9,3  18,5  29,6 |
| **Stage Of Disease**  Stage I  Stage II  Stage III  Stage VI | 3  15  15  21 | 5,6  27,8  27,8  38,9 |
| **Treatment Duration**  6 Months-1 Year  2-3 Years  4-5 Years  6 Years And Above | 21  18  6  9 | 38,9  33,3  11,1  16,7 |
| **At what stage did the treatment process begin?**  Stage I  Stage II  Stage III  StageVI | 7  18  18  11 | 13,0  33,3  33,3  20,4 |

**Table 2. Experiences of Patients Treated at the Outpatient Chemotherapy Unit After the Earthquake**

| **Did you suffer any losses in the earthquake? n %** | | |
| --- | --- | --- |
| Yes  No | 27  27 | 50,0  50,0 |
| **What did you lose in the earthquake?** | | |
| Loss of a family member  Loss of a colleague  Loss of a home  Other (Relative, Neighbor, Friend) | 18  1  6  6 | 33,3  1,9  11,1  11,1 |
| **Where are you staying after the earthquake?** | | |
| My own home  At My Relative’s House  Tent/Container  Other (neighboring/relative's village house that was not damaged by the earthquake) | 28  7  11  8 | 51,9  13,0  20,4  14,9 |
| **How many people live in your area?** | | |
| I Am Staying Alone  I Am Staying With 2 Or More People  I Do Not Have My Own Room | 6  47  1 | 11,1  87,0  1,9 |
| **Which healthcare facility was easily accessible in your area?** | | |
| Family Health Center  State Hospital  No Health İnstitution | 25  41  2 | 20,4  75,9  3,7 |
| **Did you have any problems with clothing, shelter, protection, etc. after the earthquake?** | | |
| Yes  No | 25  29 | 46,3  53,7 |
| **Is there anyone helping you manage your illness after the Earthquake?** | | |
| Yes  No | 48  6 | 88,9  11,1 |
| **Have you received financial support from any institution?** | | |
| Yes  No | 18  36 | 33,3  66,7 |
| **Did you receive psychological support after the earthquake?** | | |
| Yes  No | 1  53 | 1,9  98,1 |
| **Have you had trouble accessing your daily routine medications?** | | |
| Yes  No | 2  52 | 3,7  98,1 |
| **Did you experience any delays in your post-earthquake treatment process?** | | |
| Yes  No | 12  42 | 22,2  77,8 |
| **Did you encounter any problems accessing treatment after the earthquake?** | | |
| Yes  No | 39  15 | 72,2  27,8 |
| **Did you experience anxiety or fear in managing your illness after the earthquake?** | | |
| Yes  No | 24  30 | 44,4  55,6 |
